1  
2  
3  
4  
5  
6  
7  
8  
9  
10  
11  
12  
13  
14  
15  
16  
17  
18

## Title

**The exchange of vitamin B<sub>1</sub> and its biosynthesis intermediates in synthetic microbial communities shapes the community composition and reveals complexities of nutrient sharing**

## Running title

**Thiamin precursor exchange affects microbial communities**

Rupali R. M. Sathe<sup>1</sup>, Ryan W. Paerl<sup>2#</sup>, and Amrita B. Hazra<sup>1,3#</sup>

<sup>1</sup>Department of Biology, Indian Institute of Science Education and Research, Dr. Homi Bhabha Road, Pashan, Pune 411008, India

<sup>2</sup>Department of Marine, Earth and Atmospheric Sciences, North Carolina State University, Raleigh, North Carolina, USA

<sup>3</sup>Department of Chemistry, Indian Institute of Science Education and Research, Dr. Homi Bhabha Road, Pashan, Pune 411008, India

#Address correspondence to [amrita@iiserpune.ac.in](mailto:amrita@iiserpune.ac.in) and [rpaerl@ncsu.edu](mailto:rpaerl@ncsu.edu)

19 **Abstract**

20 Microbial communities occupy diverse niches in nature, and exchanges of metabolites  
21 such as carbon sources, amino acids, and vitamins occur routinely among the community  
22 members. While large-scale metagenomic and metabolomic studies shed some light on  
23 these exchanges, the contribution of individual species and the molecular details of  
24 specific interactions are difficult to track. Here, we explore the molecular picture of vitamin  
25 B<sub>1</sub> (thiamin) metabolism occurring in synthetic communities of *Escherichia coli* thiamin  
26 auxotrophs which engage in the exchange of thiamin and its biosynthesis intermediates.  
27 In *E. coli*, the two parts of thiamin – the 4-amino-5-hydroxymethyl-2-methylpyrimidine and  
28 the 4-methyl-5-(2-hydroxyethyl)thiazole – are synthesized by separate pathways using  
29 enzymes ThiC and ThiG, respectively, and are then joined by ThiE to form thiamin. We  
30 observed that even though *E. coli*  $\Delta thiC$ ,  $\Delta thiE$ , and  $\Delta thiG$  mutants are thiamin  
31 auxotrophs, co-cultures of  $\Delta thiC$ - $\Delta thiE$  and  $\Delta thiC$ - $\Delta thiG$  grow in a thiamin-deficient  
32 minimal medium, whereas the  $\Delta thiE$ - $\Delta thiG$  co-culture does not. Analysis of the exchange  
33 of thiamin and its intermediates in *Vibrio anguillarum* co-cultures, and in mixed co-cultures  
34 of *V. anguillarum* and *E. coli* revealed that the general pattern of thiamin metabolism and  
35 exchange among microbes is conserved across species. Specifically, the  
36 microorganisms exchange HMP and thiamin easily among themselves but not THZ.  
37 Furthermore, we observe that the availability of exogenous thiamin in the media affects  
38 whether these strains interact with each other or grow independently. This underscores  
39 the importance of the exchange of essential metabolites as a defining factor in building  
40 and modulating synthetic or natural microbial communities.

41

## 42 **Introduction**

43           Microorganisms inhabit diverse natural habitats and ecosystems, and are engaged  
44 in a multitude of interactions, including sharing and competing for essential nutrients.  
45 Microbial communities or consortia are shaped via these positive and/ or negative  
46 interactions, and have their own unique metabolic network that is defined by the spatial  
47 distribution, physiology, and availability of nutrients among the microbial participants (1–  
48 3). The exchange of biomolecules such as sugars, nucleobases, amino acids, vitamins,  
49 electron acceptors, fermentation byproducts, and metal-chelating siderophores are found  
50 to occur between members of natural and synthetic microbial consortia (1, 4–8). Some  
51 members of a microbial consortia may stop synthesizing a metabolite that is readily  
52 available in their environment, and eventually become auxotrophic for that nutrient (8, 9).  
53 Auxotrophy is beneficial for an individual organism as it allows for the reduction in  
54 metabolic burden and/ or genome size (10, 11). For example, in experiments with  
55 *Escherichia coli*, about 13% of mutants auxotrophic for vitamins, amino acids and  
56 nucleotides show a higher fitness than the wild-type strain when the missing nutrient is  
57 provided exogenously in sufficient quantities in the growth medium (12). Another study  
58 shows that the co-evolution of a co-culture of the sulfate-reducing bacterium *Desulfovibrio*  
59 *vulgaris* and an archaea *Methanococcus maripaludis* over  $10^3$  generations leads to loss-  
60 of-function mutations in the sulfur-reducing genes in *D. vulgaris*. Further, deleting these  
61 genes shows an increased yield of the corresponding *D. vulgaris* strains when compared  
62 to the wild-type strain in the co-cultures (13). Conversely, microorganisms that produce a  
63 metabolite to share or exchange with their fellow community dwellers secure a position  
64 of prominence as they become indispensable for the consortium (14). *Ruminococcus*

65 *bromii*, a starch-degrading bacterium associated with the human gut, converts starch to  
66 sugars that are substrates for other gut bacteria, thus playing the role of a keystone  
67 species (15). Thus, auxotrophy and metabolite sharing are important features for the  
68 formation and sustenance of microbial communities, and synthetic communities  
69 developed for biotechnological applications or for studying microbe-microbe interactions  
70 are often designed using these principles.

71 One of the commonly shared metabolites in microbial communities are vitamins  
72 (1, 16, 17). The activated forms of vitamins play an indispensable role as cofactors for  
73 numerous enzymes in primary metabolism across all domains of life. Several  
74 metagenomic analyses reveal that the water-soluble group B vitamins are readily  
75 exchanged in marine microbial communities, the human gut microbiota, and communities  
76 associated with insects and other hosts (17–20). Of these, vitamin B<sub>1</sub> (also known as  
77 thiamin) is an important member of the group B vitamins that plays an essential role in  
78 carbohydrate, amino acid, and lipid metabolism by assisting enzymes in conducting  
79 “impossible” decarboxylations (21). In the human gut microbiome, B<sub>1</sub> auxotrophy appears  
80 to be most widespread at both the genus and family level (17).

81 Even though most bacteria, plants and eukaryotes such as fungi are capable of  
82 thiamin biosynthesis, many other organisms are unable to produce it and instead acquire  
83 it from their surroundings or their diet. The structure of thiamin consists of a 5-membered  
84 4-methyl-5-(2-hydroxyethyl)thiazole ring (THZ) and a 6-membered 4-amino-5-  
85 hydroxymethyl-2-methylpyrimidine ring (HMP) which are synthesized in the natural world  
86 in their phosphorylated forms, THZ-P and HMP-P, respectively, in two distinct branches  
87 of the thiamin biosynthesis pathway. The HMP-P is further phosphorylated to HMP-PP,

88 following which the diphosphate is displaced by an attack via the THZ-P ring nitrogen to  
 89 form a methylene bridge between the two rings to yield thiamin monophosphate (TMP)  
 90 (Figure 1A). A final phosphorylation of TMP yields thiamin diphosphate (TDP), which is  
 91 used as a cofactor by enzymes for cellular metabolism.

92  
 93

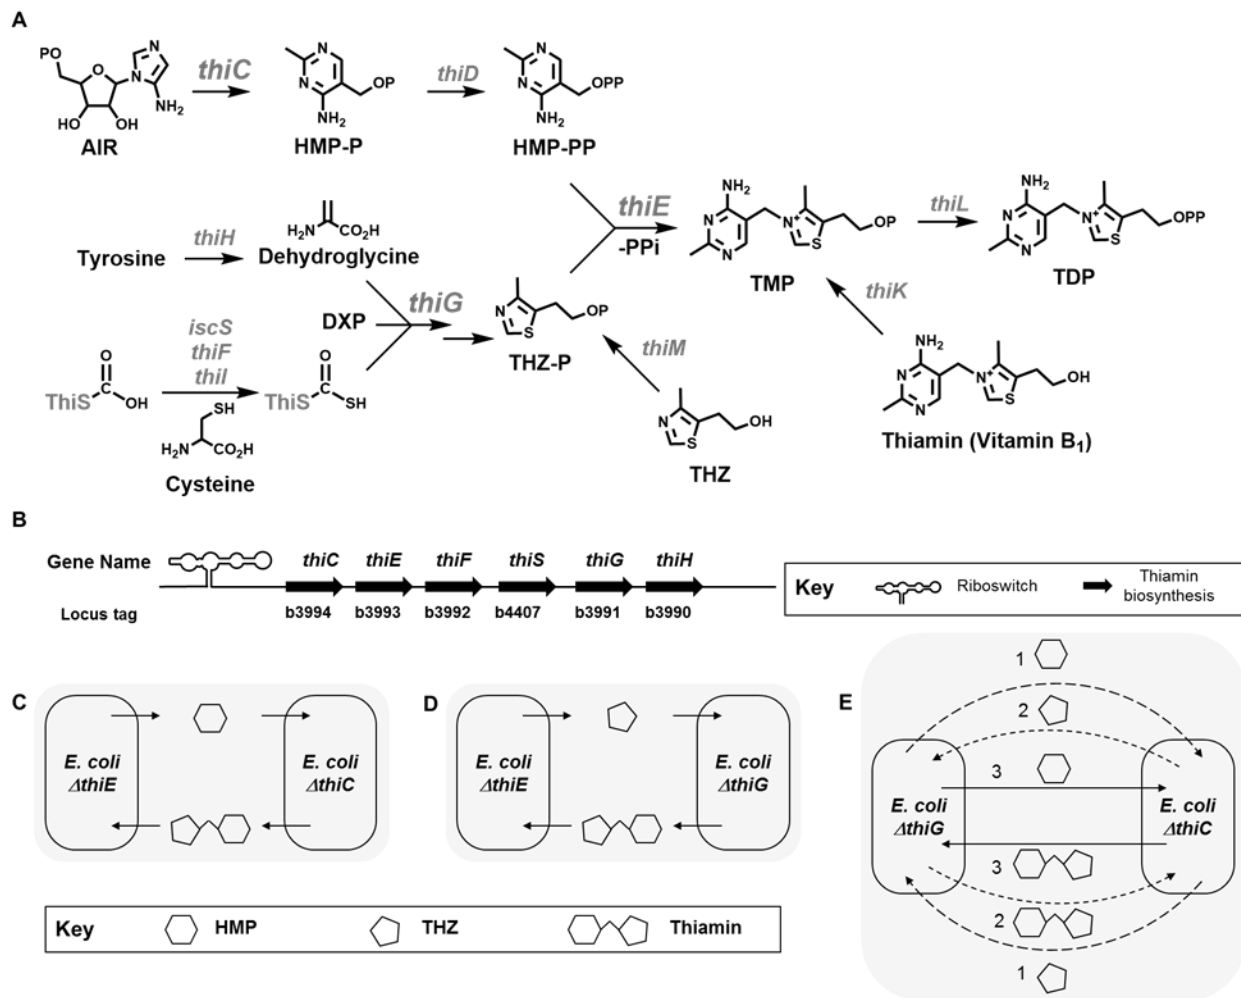

94  
 95 **Figure 1. An overview of the thiamin biosynthesis pathway in *E. coli* str. K-12 substr.**  
 96 **MG1655. (A)** Major and relevant steps in the thiamin biosynthesis pathway are depicted. All  
 97 phosphate groups are indicated as P. The 4-amino-5-hydroxy-2-methylpyrimidine phosphate  
 98 (HMP-P) ring is formed by rearrangement of its precursor aminoimidazole ribotide (AIR), by the

99 enzyme ThiC. The 4-methyl-5-(2-hydroxyethyl)thiazole ring (THZ) is formed by the enzyme ThiG.  
100 The sulfur in the THZ ring is transferred through a cascade of enzymes IscS, ThiI, ThiF and ThiS  
101 in the form of a thiocarboxylate moiety. The 1-deoxyxylulose-5-phosphate is synthesized by Dxs,  
102 and the ThiH enzyme converts tyrosine to dehydroglycine. ThiD, ThiM, and ThiK act as kinases  
103 for HMP-P, THZ, and thiamin respectively. The enzyme ThiE attaches the HMP-PP and the THZ-  
104 P rings together in the final steps of the pathway to form thiamin monophosphate (TMP) and ThiL  
105 phosphorylates it to form the active form of the cofactor, thiamin pyrophosphate/ diphosphate  
106 (TDP). Abbreviations: AIR = 5'-phosphoribosyl-5-aminoimidazole, DXP = 1-deoxyxylulose-5-  
107 phosphate, HMP-P = 4-amino-5-hydroxymethyl-2-methylpyrimidine phosphate, HMP-PP = 4-  
108 amino-5-hydroxymethyl-2-methylpyrimidine diphosphate, THZ-P = 4-methyl-5-(2-  
109 hydroxyethyl)thiazole phosphate, THZ = 4-methyl-5-(2-hydroxyethyl)thiazole. Enzyme names are  
110 written in grey. **(B)** The arrangement of the genes involved in the *de novo* biosynthesis pathway  
111 for thiamin in *E. coli* K-12 MG1655. We hypothesize that **(C)** the co-culture of *EcΔthiC-EcΔthiE*  
112 strains can survive by exchanging HMP and thiamin, **(D)** the co-culture of *EcΔthiE-EcΔthiG* strains  
113 can survive by exchanging THZ and thiamin, and **(E)** the co-culture of numbers *EcΔthiC-EcΔthiG*  
114 strains can survive in three possible scenarios where metabolites are exchanged in following  
115 pairs: 1 – exchange of HMP and THZ, 2 – exchange of THZ and thiamin, and 3 – exchange of  
116 HMP and thiamin. Hexagon – HMP, pentagon – THZ, linked hexagon and pentagon – thiamin.

117 Thiamin and its intermediates THZ and HMP are stable under physiological  
118 conditions and are salvaged from the environment by organisms for producing thiamin.  
119 Metagenomic analysis of the human gut microbiome reveals that the thiamin biosynthesis  
120 and salvage pathways display the largest variety of intermediates and non-canonical  
121 metabolic precursors (17). Recent findings implicate HMP as an important metabolite in  
122 shaping marine algal and bacterial consortia (22). Additionally, studies show that there  
123 exist thiamin auxotrophs that lack thiamin transporters but instead contain putative

124 transporters for the uptake of HMP and/ or THZ, which permit the salvage of these  
125 intermediates to produce thiamin (16, 23, 24). Examples of HMP and thiamin transporters  
126 and their uptake have been reported widely in literature (25–28). On the other hand,  
127 information on THZ uptake and exchange is limited to only a handful of studies that predict  
128 a THZ transporter and show the uptake of the precursor carboxythiazole (16, 25, 26, 29,  
129 30).

130         The modular nature of thiamin biosynthesis where HMP and THZ are found to be  
131 independently synthesized and salvaged makes this pathway a unique candidate for  
132 studying metabolic crosstalk within microbial co-cultures. To experimentally validate  
133 some of these findings, we require a simple model system whose members are engaged  
134 in thiamin, THZ, and HMP exchange. Such a system will allow us to (i) understand thiamin  
135 biosynthesis at a community level, that is, beyond what occurs in individual organisms  
136 and (ii) establish the design principles of building synthetic communities sustained by  
137 thiamin biosynthesis and uptake with diverse biotechnological applications.

138         In this study, we create a series of thiamin-dependent synthetic co-cultures using  
139 *E. coli*, a gram-negative bacterium that is capable of *de novo* thiamin synthesis and  
140 salvage, and is a member of several environmental and enteric microbial communities.  
141 In *E. coli*, the formation of the HMP-P ring is catalyzed by the enzyme ThiC, the THZ-P  
142 ring is synthesized by a host of enzymes including ThiG, and subsequently, these rings  
143 are coupled together by ThiE to form TMP. Also, no known transporters and salvage  
144 enzymes of the HMP or THZ or their analogues are found in this organism, and only one  
145 known transporter ThiBPQ exists to facilitate thiamin transport (22, 25, 26, 30–32). We  
146 generated *E. coli* str. K-12 substr. MG1655 thiamin biosynthesis mutants -  $\Delta$ *thiC*,  $\Delta$ *thiE*

147 and  $\Delta thiG$  - which are impaired in *de novo* thiamin biosynthesis, and thus are thiamin  
148 auxotrophs. We then set up pairwise synthetic co-cultures of these three *E. coli* mutants  
149 to study their growth over short time periods. We also analyzed the exchange of thiamin,  
150 THZ, and HMP at a molecular level, and its effect on the community composition. Further,  
151 we studied similar co-cultures of another gammaproteobacterium *Vibrio anguillarum* and  
152 finally, mixed co-cultures of *E. coli* and *V. anguillarum* to understand the extent to which  
153 our findings on thiamin metabolism within the *E. coli* communities hold true for other  
154 bacteria.

155         A unique property of the thiamin-based synthetic consortia we have devised is that  
156 these are reliant on the exchange of precursors and intermediates within a single  
157 metabolic pathway, as compared to other synthetic co-culture studies in literature which  
158 involve exchange of molecules derived from two or more metabolic pathways (4, 6, 33).  
159 The advantages of a co-culture system which is based on the biosynthesis of a single  
160 metabolite are: (a) the growth conditions of individual strains are similar as they are  
161 auxotrophs for the same metabolite, (b) the regulation of the biosynthesis and uptake of  
162 individual intermediates along the pathway can be studied, and (c) coupling the results  
163 we observe from our system with genetic data from isolates and metagenomes has the  
164 potential to improve predictions of B1-related auxotrophy and metabolite exchange in  
165 natural systems.

166         Our results indicate that the rules of exchange of thiamin and its intermediates are  
167 broadly similar across organisms, and variations may be predicted based on growth  
168 conditions and the genome sequences of the interacting species. We also observe  
169 temporal changes in the ratios of the *thi* mutants in our co-cultures based on the ability



170 of the strains to either make B<sub>1</sub> or a B<sub>1</sub> biosynthesis intermediate, or use exogenously  
171 added B<sub>1</sub>. Our findings inform on the physiology of single microbial members with regard  
172 to thiamin metabolism within the context of a microbial community. Finally, our study  
173 highlights the nature of interdependencies that arise from relying on acquiring essential  
174 metabolites from the environment or from fellow community members.

175

## 176 **Results**

### 177 ***E. coli* thiamin biosynthesis auxotrophic mutants show concentration-dependent** 178 **increase in growth when supplemented with thiamin or its biosynthesis** 179 **intermediates**

180 *E. coli* is capable of producing TDP *de novo* and also contains genes to salvage  
181 thiamin from its environment (Figure 1A). All the major genes for thiamin synthesis and  
182 salvage are found in three operons: (i) *thiCEFSGH*, which conducts *de novo* thiamin  
183 biosynthesis (Figure 1B), (ii) *thiMD*, which codes for kinases in the salvage pathway, and  
184 (iii) *thiBPQ*, which codes for an ABC-type thiamin transporter (34) (Figure S1A). All three  
185 operons are regulated by TDP-dependent riboswitches (35).

186 To begin our studies, we created three knockout *E. coli* K-12 MG1655 strains -  
187 *EcΔthiC*, *EcΔthiE* and *EcΔthiG* (referred to as the *thi* mutant strains) - and noted that all  
188 three strains grew without any growth disadvantage in a nutrient-rich medium (Figure  
189 S2A). Next, we tested their growth in a thiamin-deficient minimal medium containing M9  
190 salts with glucose and NH<sub>4</sub>Cl as the carbon and nitrogen sources, respectively. We  
191 expected that they would require exogenously added thiamin for growth in this media, but  
192 to our surprise, all three strains survived well in the first passage (P1) from the nutrient-

193 rich to the minimal medium (Figure S2C). A second passage (P2) of the mutants in the  
194 thiamin-deficient minimal medium showed significantly lesser growth as compared to the  
195 wild-type strain, and the third passage (P3) showed no growth, indicating that the *thi*  
196 mutant strains were indeed thiamin auxotrophs (Figure 2A-D, no thiamin added trace,  
197 Figure S2E). Our results match similar observations in literature, which note that thiamin  
198 stored inside the cells during their growth in rich media is carried over into a few  
199 generations of cell growth (36, 37). For all future experiments, the P2 cells were used as  
200 this allowed for us to have some cells from the controls for thiamin quantitation  
201 experiments while yet showing a sufficient difference in optical density (OD<sub>600</sub>) between  
202 the single culture and co-culture growth experiments.

203         Next, to determine the minimum thiamin concentration required by the *thi* mutant  
204 strains, we tested their growth in minimal medium supplemented with thiamin  
205 concentrations ranging from 0 to 20 μM. We found that while these strains show low  
206 growth with up to 1 nM thiamin, they are able to achieve an OD<sub>600</sub> of ~0.6 with 100 nM, 1  
207 μM and 20 μM thiamin (Figures 2B, 2C and 2D). This shows that thiamin is the growth-  
208 limiting nutrient for the *thi*- mutants. To ensure that thiamin is not limiting in our assays,  
209 all further experiments were conducted with 20 μM thiamin unless otherwise stated. We  
210 further complemented each knockout strain with a plasmid containing the deleted gene  
211 and confirmed that growth can be restored in these strains in minimal medium in the  
212 absence of thiamin, as also observed in previous literature studies (Figure S3) (38–40).

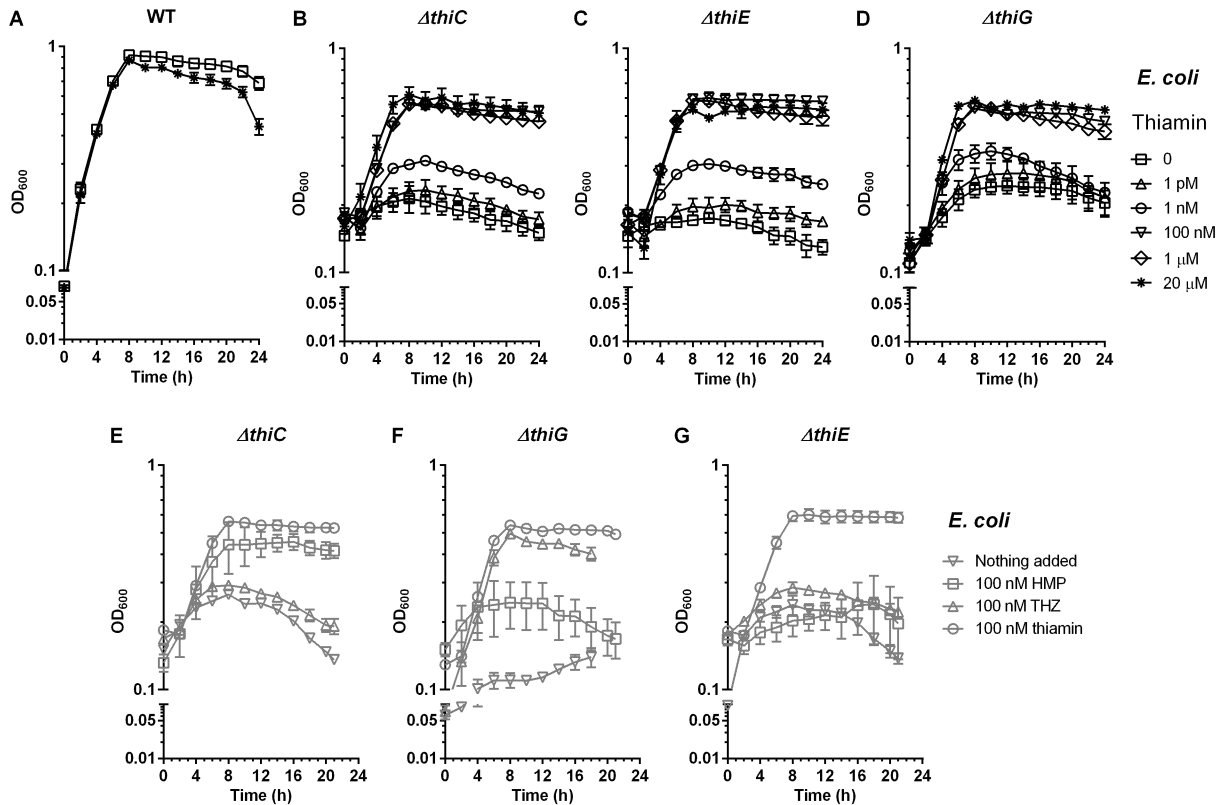

213

214 **Figure 2. Supplementation of thiamin, HMP and THZ to the thiamin mutants of *E. coli* K-12**

215 **MG1655 in M9 medium. Growth phenotype of (A) the wild-type strain, (B) the *Ec* $\Delta thiC$  strain, (C)**

216 **the *Ec* $\Delta thiE$  strain, and (D) the *Ec* $\Delta thiG$  strain. Symbols in panels (A-D) depict the following**

217 **concentrations of thiamin:  $\square$  = Nothing added,  $\circ$  = 1 pM,  $\Delta$  = 1 nM,  $\nabla$  = 100 nM,  $\diamond$  = 1  $\mu$ M, \* = 20**

218  **$\mu$ M. Supplementation to (E) the *Ec* $\Delta thiC$  mutant, (F) the *Ec* $\Delta thiG$  mutant, and (G) the *Ec* $\Delta thiE$**

219 **mutant. Symbols in panels (E-G) depict the following:  $\nabla$  = no HMP/ THZ,  $\square$  = 100 nM HMP,  $\Delta$  =**

220 **100 nM THZ,  $\circ$  = 100 nM thiamin. Means  $\pm$  standard errors of the means from three independent**

221 **experiments are plotted.**

222 **We expect the *Ec* $\Delta thiC$  and *Ec* $\Delta thiG$  strains to be impaired in the biosynthesis of**

223 **the intermediates HMP and THZ, respectively, while the *Ec* $\Delta thiE$  mutant should not be**

224 **able to link them together to synthesize thiamin. To test this, we fed HMP and THZ to the**

225 *thi*- mutants in varying concentrations ranging from 0-1  $\mu$ M. The *Ec $\Delta$ thiC* strain survived  
226 only when supplemented with HMP but not with THZ (Figures 2E, S4), the *Ec $\Delta$ thiG* strain  
227 when supplemented with THZ but not with HMP (Figures 2F, S4), and the *Ec $\Delta$ thiE* strain  
228 was unable to survive with either HMP or THZ alone (Figures 2G, S4). This confirms that  
229 the metabolic phenotypes of the *thi*- mutants are correlated to their genotypes.

230

### 231 **Specific co-cultures of the thiamin biosynthesis mutants grow in minimal medium** 232 **with no exogenously added thiamin**

233 Next, we constructed three pairwise co-cultures *Ec $\Delta$ thiC-Ec $\Delta$ thiE* (*Ec-CE*),  
234 *Ec $\Delta$ thiC-Ec $\Delta$ thiG* (*Ec-CG*), and *Ec $\Delta$ thiE-Ec $\Delta$ thiG* (*Ec-EG*) and studied their growth in  
235 thiamin-deficient minimal medium. We hypothesized that, if the *thi*- mutant strains can  
236 share thiamin biosynthesis intermediates among themselves and produce thiamin, the  
237 co-cultures will survive as opposed to the single cultures which are auxotrophic and perish  
238 under similar growth conditions. We started these co-cultures with 9:1, 1:1 and 1:9 ratios  
239 and observed their growth over a period of 24 hrs. We observed that the 1:9 ratio of the  
240 *Ec-CE* co-culture and the *Ec-CG* co-culture showed increased survival as compared to  
241 the individual pure cultures (Figure 3A and B, data for the 9:1 and 1:1 not shown). On the  
242 other hand, the *Ec-EG* co-culture showed no difference in growth when compared to their  
243 individual pure cultures (Figure 3C).

244 There are several possibilities of exchange of thiamin and its intermediates that  
245 account for the survival of the *Ec-CE* and *Ec-CG* co-cultures (Figures 1C-E). The *Ec $\Delta$ thiC*  
246 strain cannot synthesize HMP, but if it can acquire it from its environment, it can combine  
247 the HMP with the THZ it synthesizes to form thiamin. Alternately, it can acquire thiamin

248 directly from its environment. Similarly, the *EcΔthiG* strain cannot synthesize THZ, but it  
249 can grow if it acquires THZ or thiamin from its surrounding. On the other hand, the *EcΔthiE*  
250 strain can synthesize both the HMP and the THZ intermediates, but is unable to combine  
251 them to form thiamin and needs to acquire it from its growth medium. The growth  
252 observed in the *Ec-CE* co-culture can be explained only if the *EcΔthiE* strain  
253 supplemented the *EcΔthiC* strain with HMP, and the *EcΔthiC* strain in return  
254 supplemented the *EcΔthiE* strain with thiamin (Figure 1C, 3A). This indicates that both  
255 HMP and thiamin are likely being exchanged in the medium. On similar lines, the *Ec-EG*  
256 co-culture can grow only if the *EcΔthiE* strain supplemented the *EcΔthiG* strain with THZ,  
257 and the *EcΔthiG* strain in return, supplemented the *EcΔthiE* strain with thiamin (Figure  
258 1D, 3C). As the *Ec-EG* co-culture does not grow, and we know that THZ and thiamin are  
259 salvaged by the *E. coli* cells based on our feeding studies and thiamin is also exchanged  
260 as per the results of the *Ec-CE* co-culture, this result suggests that THZ is possibly not  
261 present at a large enough concentration to be taken up by the *EcΔthiG* mutant. The  
262 absence of any annotated THZ transporters in *E. coli* also supports this hypothesis.  
263 Interestingly, the *Ec-CG* co-culture shows a distinct increase in its growth as compared  
264 to the individual pure cultures grown in thiamin-deficient medium (Figure 3B). The *Ec-CG*  
265 co-culture can grow in three scenarios: (i) the *EcΔthiC* strain and the *EcΔthiG* strain  
266 provided the other with THZ and HMP, respectively, or (ii) the *EcΔthiC* strain provided the  
267 *EcΔthiG* strain with THZ and, the *EcΔthiG* strain synthesized thiamin and provided it back  
268 to the *EcΔthiC*, or (iii) the *EcΔthiG* strain provided the *EcΔthiC* strain with HMP and, the  
269 *EcΔthiC* strain synthesized thiamin and provided it back to the *EcΔthiG* strain (Figure 1E).

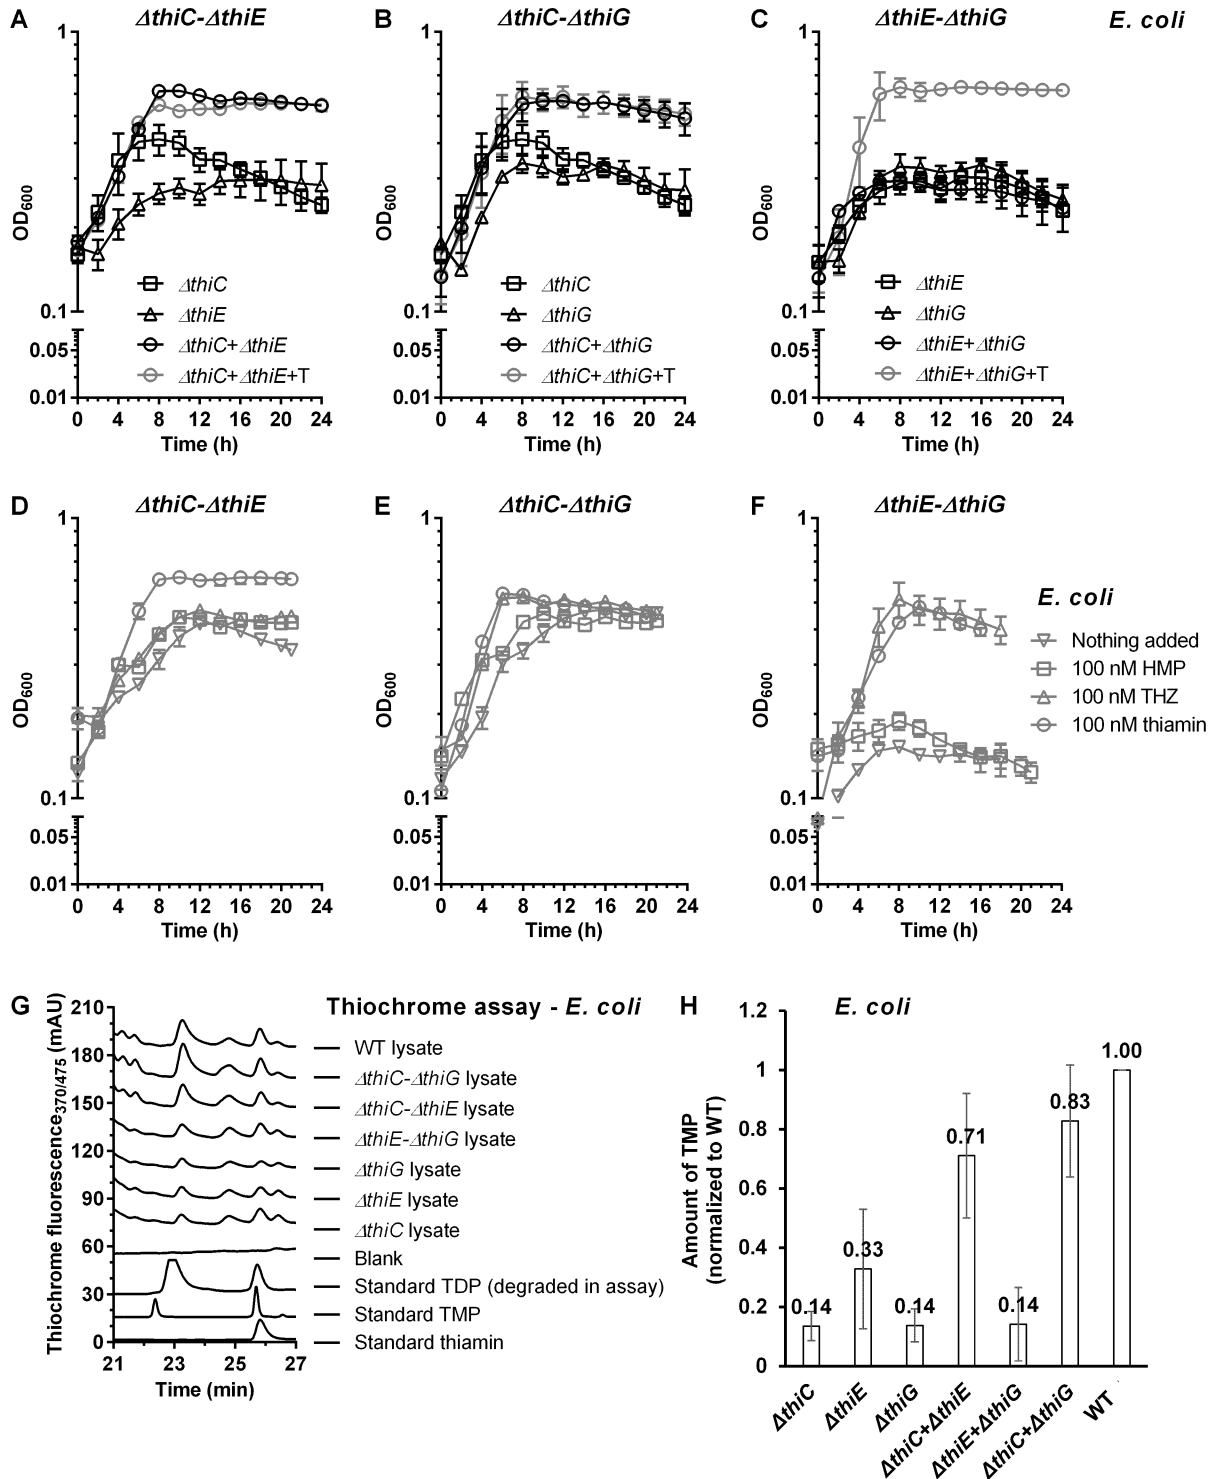

270

271 Figure 3. Thiamin biosynthesis mutants of *E. coli* K-12 MG1655 grow in pairwise co-

272 cultures in thiamin-deficient M9 medium. Co-culture of (A) the *Ec* $\Delta thiC$ -*Ec* $\Delta thiE$  strains, (B)

273 the *EcΔthiE-EcΔthiG* strains, and **(C)** the *EcΔthiC-EcΔthiG* strains. Supplementation to **(D)** the  
274 *ΔthiC-ΔthiE* co-culture, **(E)** the *ΔthiE-ΔthiG* co-culture, and **(F)** the *ΔthiC-ΔthiG* co-culture. Symbols  
275 in panels **(D-F)** depict the following: ▽ = no HMP/ THZ, □ = 100 nM HMP, Δ = 100 nM THZ, ○ =  
276 100 nM thiamin. **(G)** HPLC of thiochrome assay samples to detect thiamin from co-culture lysates.  
277 **(H)** Amount of thiochrome monophosphate (TMP) normalized to that in the WT strain, detected in  
278 lysates of monocultures or co-cultures of the thiamin biosynthesis mutants grown in P2. Means ±  
279 standard errors of the means from three independent experiments are plotted.

280 As the data of the *Ec-EG* co-culture indicates that THZ is likely not being exchanged, only  
281 the third possibility remains for the *Ec-CG* co-culture, that is, HMP and thiamin are  
282 exchanged among the thiamin biosynthesis mutants. Incidentally, several reports in  
283 literature note the exchange or release of HMP among microbial communities, confirming  
284 our observation (23, 41).

285         Next, we compared between carbon sources to understand whether these results  
286 hold true across different growth conditions. In addition to glucose, we chose pyruvate  
287 and succinate as their utilization requires thiamin. Similar to what we observed with  
288 glucose, the *Ec-CE* and *Ec-CG* co-cultures showed growth in pyruvate and succinate  
289 minimal media without thiamin while the *Ec-EG* did not, and the growth of the *Ec-CG* co-  
290 culture was highest among the three (Figure S5). As the metabolism of glucose, pyruvate  
291 and succinate require thiamin-utilizing enzymes, our growth studies imply that the *Ec-CE*  
292 and *Ec-CG* co-cultures are able to synthesize thiamin. The *Ec-CE* co-culture showed  
293 lower growth in the presence of pyruvate and succinate as compared to glucose, and thus  
294 we continued with glucose as the carbon source for all further experiments.

295

296 **Analysis of the co-cultures demonstrate that the exchange of HMP and thiamin aids**  
297 **their survival**

298 To probe the growth patterns observed for the *Ec-CE*, *Ec-CG* and *Ec-EG* co-  
299 cultures, we conducted a supplementation study with a range of HMP and THZ  
300 concentrations (Figures 3D-F, Figure S4). We observed that while the *Ec-CE* and *Ec-CG*  
301 co-cultures each show growth without or with supplementation with both molecules, the  
302 *Ec-EG* co-culture survives only when fed with THZ, but not with HMP (Figure 3F).  
303 Interestingly, the *EcΔthiG* mutant can survive with 1 nM THZ, whereas the *EcΔthiC* mutant  
304 requires 100 nM HMP to survive (Figures S4A, I, K). This indicates that *E. coli* differs in  
305 its ability to either acquire and/ or utilize the thiamin biosynthesis intermediates THZ and  
306 HMP. This result also sheds light on one of our preliminary observations that when the  
307 *Ec-CE* and *Ec-CG* co-cultures were started at a total OD<sub>600</sub> of 0.01 in the P2 passage  
308 instead of 0.1, they were unable to survive (data not shown). We attribute this to the lack  
309 of an adequate pool of thiamin intermediates at the start that would allow the co-culture  
310 strains to begin dividing and cooperating, thus ensuring their survival.

311

312 ***De novo* biosynthesis of thiamin occurs within co-cultures**

313 To verify that the growth of the co-cultures is due to the *de novo* biosynthesis of  
314 thiamin, we analyzed the lysates of the cells grown in thiamin-deficient media from the  
315 second passage P2 for single cultures and co-cultures for the presence of thiamin and its  
316 phosphorylated versions TMP and TDP. To do so, we used the thiochrome assay which  
317 employs an oxidation reaction under alkaline conditions to generate a fluorescent  
318 derivative of thiamin (42). Firstly, we noted that under the thiochrome assay conditions



319 we used, the standard thiochrome diphosphate formed is unstable, and undergoes  
320 dephosphorylation (Figure 3G, HPLC trace). Next, we analyzed the lysates of the *Ec-CE*  
321 co-cultures and the *Ec-CG* co-cultures and noted that the levels of thiochrome  
322 monophosphate in them were significantly higher than their respective single cultures  
323 when measured at 24 hr, and similar to those in the wild-type *E. coli* cell lysate (Figure  
324 3G, H). In contrast, the amounts of thiochrome monophosphate detected from the lysates  
325 of the *Ec-EG* co-cultures and their respective single cultures were similar, and were  
326 significantly lower than the wild-type lysate (Figure 3G, H). This implies that thiamin is  
327 synthesized *de novo* in the *Ec-CE* and *Ec-CG* co-cultures. Further, LC-MS/MS analysis  
328 of these samples confirmed the presence of thiamin in the lysates of the co-cultures  
329 (Figure S6). Taken together, these results show that the *Ec-CE* and the *Ec-CG* co-  
330 cultures grow due to *de novo* thiamin synthesis, whereas the *Ec-EG* co-cultures do not  
331 survive as they are unable to produce thiamin.

332

### 333 ***Vibrio anguillarum* thiamin mutants follow a similar pattern of exchange as *E. coli***

334 In order to determine whether the pattern of exchange of thiamin biosynthesis  
335 intermediates observed in *E. coli* is conserved across other microbes, we analyzed  
336 another gammaproteobacterium *Vibrio anguillarum* str. PF430-3 which is capable of *de*  
337 *novo* thiamin biosynthesis and salvage (Figure S1B). Similar to the previous experiment,  
338 *V. anguillarum*  $\Delta thiC$ ,  $\Delta thiE$ , and  $\Delta thiG$  mutant strains were grown individually and in  
339 pairwise co-cultures in thiamin-deficient M9 medium (Figure 4).

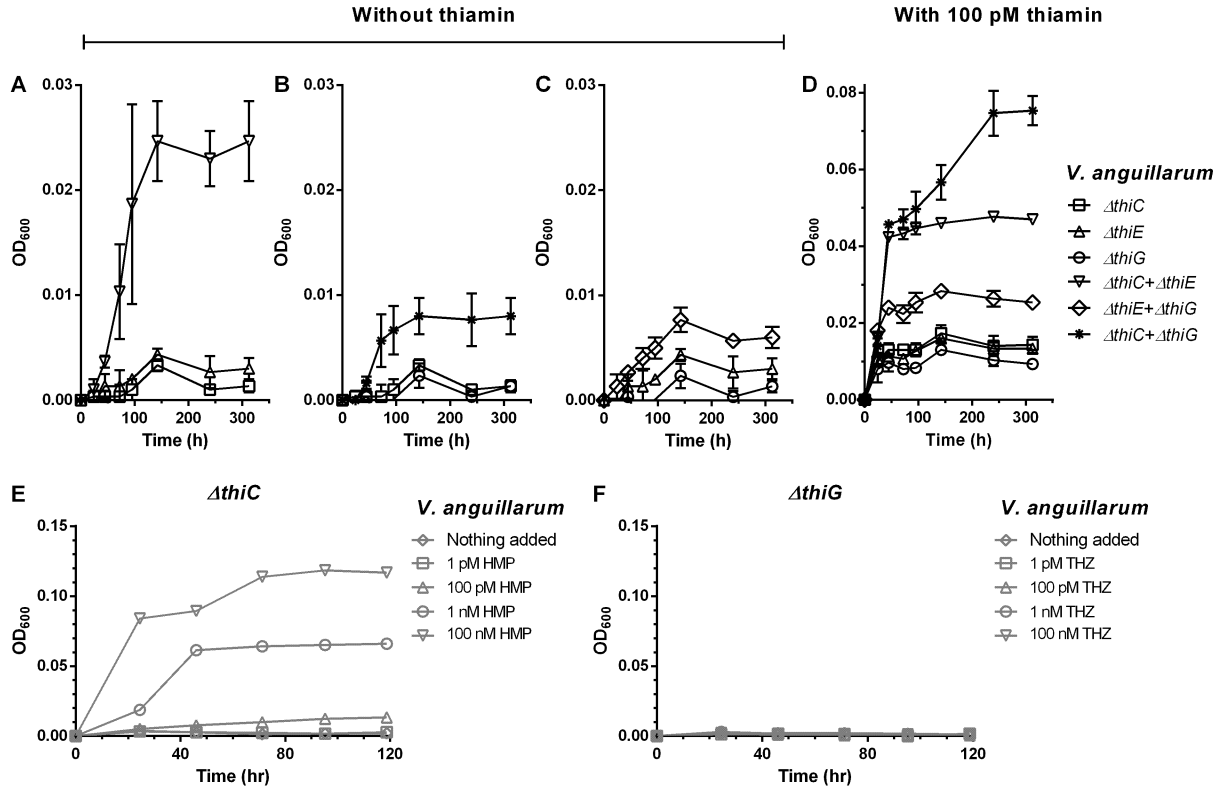

340

341 **Figure 4. Thiamin biosynthesis mutants of *V. anguillarum* str. PF430-3 grow in pairwise co-**  
 342 **cultures in thiamin-deficient M9 medium. Co-cultures of (A) the *Va* $\Delta thiC$ -*Va* $\Delta thiE$  strains, (B)**  
 343 **the *Va* $\Delta thiC$ -*Va* $\Delta thiG$  strains, and (C) the *Va* $\Delta thiE$ -*Va* $\Delta thiG$  strains without thiamin**  
 344 **supplementation. Co-cultures of (D) the *Va* $\Delta thiC$ , *Va* $\Delta thiE$ , and *Va* $\Delta thiG$  strains supplemented**  
 345 **with 100 pM thiamin. (E) HMP supplementation to the *Va* $\Delta thiC$  mutant. (F) THZ supplementation**  
 346 **to the *Va* $\Delta thiG$  mutant. Symbols in panels (D) and (F) depict the following concentrations of HMP**  
 347 **and THZ respectively:  $\diamond$  = nothing added,  $\square$  = 1 pM,  $\triangle$  = 100 pM,  $\circ$  = 1 nM,  $\nabla$  = 100 nM. Means**  
 348  **$\pm$  standard deviations from three independent experiments are plotted.**

349 *As V. anguillarum* and *E. coli* are both gammaproteobacteria containing the same  
 350 set of thiamin genes except the kinase *thiM*, we expect *V. anguillarum* to show a similar  
 351 pattern of exchange (Figure S1). The *V. anguillarum*  $\Delta thiC$ ,  $\Delta thiE$  and the  $\Delta thiG$  single

352 cultures showed no background growth in the P1 passage, and a concentration-  
353 dependent increase in growth starting with nanomolar concentrations of supplemented  
354 thiamin (Figure S7). For the co-cultures grown without supplemented thiamin, we  
355 observed that the *V. anguillarum* CE (*Va-CE*) co-culture showed significant growth  
356 followed by the *Va-CG* co-culture, while the *Va-EG* co-culture showed background  
357 growth, similar to what we observed in *E. coli* (Figures 4A-C). When supplemented with  
358 100 pM thiamin, the *Va-CE*, *Va-CG* and *Va-EG* co-cultures grew significantly better than  
359 the single cultures, reiterating that the co-cultures were likely producing thiamin (Figure  
360 4D). Interestingly, even though the *V. anguillarum*  $\Delta$ *thiC* strain shows concentration-  
361 dependent increase in growth when supplemented with HMP similar to its *E. coli*  
362 counterpart, the *Va* $\Delta$ *thiG* strain does not grow with exogenously added THZ (Figures 4E,  
363 F). This indicates that unlike the *E. coli*  $\Delta$ *thiG* mutant, whose growth can be  
364 complemented by thiamin and THZ, the *V. anguillarum*  $\Delta$ *thiG* mutant can be  
365 complemented only by thiamin. This may be attributed to the absence of the thiazole  
366 kinase gene *thiM* in *V. anguillarum*, which is considered to be a salvage enzyme that  
367 phosphorylates THZ to produce THZ-P for incorporation in thiamin biosynthesis in *E. coli*  
368 and other organisms (Figure 1, Figure S1).

369

### 370 ***V. anguillarum* and *E. coli* thiamin mutants exchange thiamin and its biosynthesis**

### 371 **intermediates among themselves**

372 Finally, to test whether the pattern of exchange that we observe occurs across  
373 different species, we created mixed co-cultures of the *E. coli*  $\Delta$ *thiG* with *V.*  
374 *anguillarum*  $\Delta$ *thiC* and  $\Delta$ *thiE* strains in a pairwise manner. The *V. anguillarum*  $\Delta$ *thiC*- *E.*

375 *coli*  $\Delta$ thiG (*VaC-EcG*) co-culture survived without thiamin supplementation as compared  
376 to the individual strains (Figure 5A). Surprisingly, the *VaE-EcG* co-culture also grew  
377 significantly better than the individual strains without thiamin supplementation (Figure 5B),  
378 even though the overall growth was lower than the *VaC-EcG* co-culture. This result is  
379 contrary to what was observed in the *Va-EG* or the *Ec-EG* co-cultures which did not grow  
380 beyond the background level. This indicates that THZ synthesized by the *V. anguillarum*  
381  $\Delta$ thiE strain might be available in the medium at a concentration that allows the *E. coli*  
382  $\Delta$ thiG to grow and produce thiamin and share it in return with *V. anguillarum*  $\Delta$ thiE. The  
383 *VaC-EcG* and *VaE-EcG* co-cultures grow to similar OD<sub>600</sub> with 100 pM of supplemented  
384 thiamin as expected (Figure 5C).

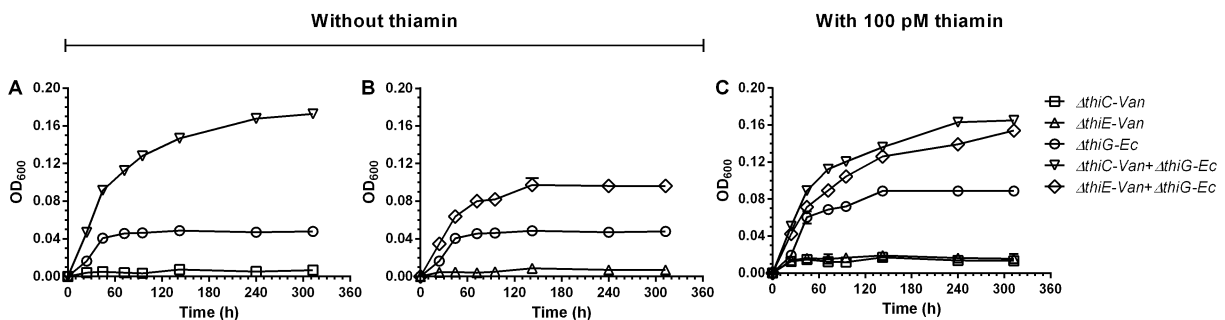

385  
386 **Figure 5. Mixed-species co-cultures of the thiamin biosynthesis mutants of *V. anguillarum***  
387 **PF430-3 and *E. coli* K-12 MG1655 in thiamin-deficient M9 medium. Mixed co-culture of (A)**  
388 **the *Va* $\Delta$ thiC-*Ec* $\Delta$ thiG strains and (B) the *Va* $\Delta$ thiE-*Ec* $\Delta$ thiG strains without thiamin**  
389 **supplementation. (C) Co-culture of the *Va* $\Delta$ thiC or *Va* $\Delta$ thiE and *Ec* $\Delta$ thiG strains with 100 pM**  
390 **thiamin. Means  $\pm$  standard deviations from three independent experiments are plotted.**

391 To summarize, the *CE* and *CG* co-cultures of only *E. coli* or *V. anguillarum* strains  
392 can survive in the absence of externally supplemented thiamin, whereas the *EG* co-  
393 cultures cannot. These experiments implicate that in a community of thiamin auxotrophs,

394 HMP and thiamin are shared more readily, but not THZ. Further, results obtained from  
395 the mixed co-cultures of *E. coli* and *V. anguillarum* strains suggest that even though THZ  
396 is picked up when present at higher concentrations, it might not be readily shared among  
397 microorganisms as the concentrations produced are too low to be salvaged.

398

399 **The ratio of the individual strains within the co-culture is determined by the**  
400 **exchange of thiamin and its biosynthesis intermediates**

401 Our observations of the co-culture experiments thus far are based on the total  
402 OD<sub>600</sub> of the co-cultures. To understand and quantify the contribution of each individual  
403 strain, we created the *thi* mutants fluorescently labeled with green fluorescent protein  
404 (GFP) and set up the pairwise *Ec-CE* and *Ec-CG* co-cultures in thiamin-deficient minimal  
405 media, where one of the strains in each co-culture was fluorescently labeled (Figure S2B,  
406 D). This approach allows us to quantify the amount of each strain in the co-culture using  
407 the two parameters – (i) the total OD<sub>600</sub>, and (ii) the fluorescence of the co-culture which  
408 indicates the growth of the GFP-tagged strain. Briefly, we generated a standard curve of  
409 fluorescence versus OD<sub>600</sub> for each individual strain, following which we set up the  
410 following pairs of cultures (GFP strain indicated with an asterisk) - *Ec-C\*E* and *Ec-CE\**  
411 with the controls *Ec-C\*E\** and *Ec-CE*, and a similar set for the *Ec-CG* co-cultures. We  
412 then noted the increase in the OD<sub>600</sub> and fluorescence values over time and mapped the  
413 fluorescence signal of the co-culture to the standard curve of the corresponding GFP-  
414 tagged strain, allowing us to quantify its OD<sub>600</sub> in the co-culture (Figure S8). The remaining  
415 untagged strain numbers were then calculated by subtracting this number from the total

416 OD<sub>600</sub>, eventually yielding the ratios of the two strains over the course of the co-culture  
 417 growth.

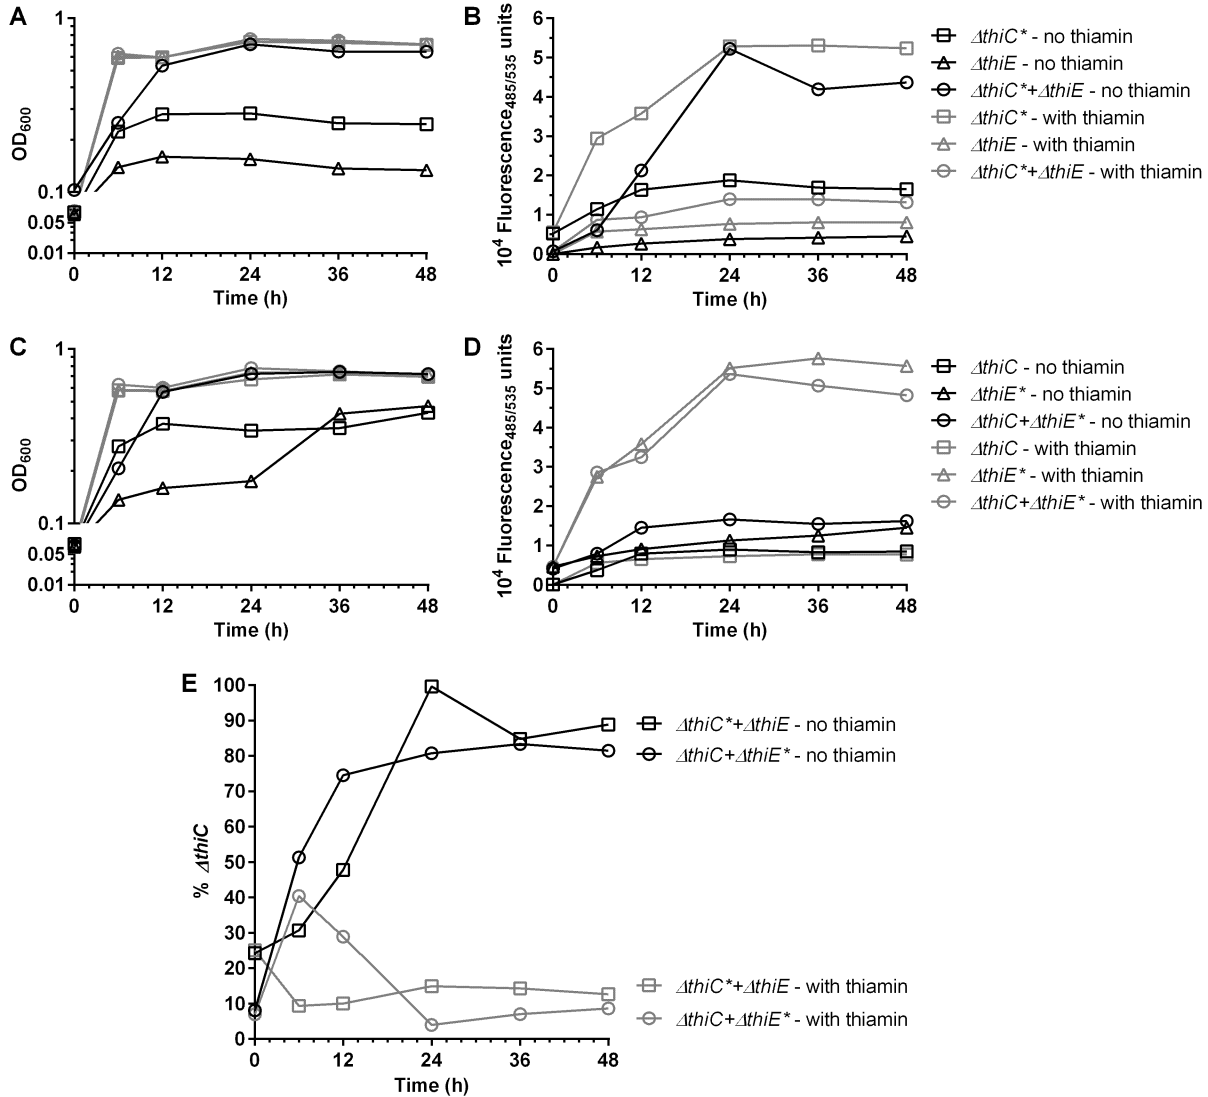

418  
 419 **Figure 6. Growth phenotypes and fluorescence of the monocultures and the co-cultures of**  
 420 **the thiamin mutant strains.** The strains containing the *GFPmut2* cassette are marked with an  
 421 asterisk. Black symbols = without thiamin, grey symbols = with thiamin. **(A)** OD<sub>600</sub> and **(B)**  
 422 fluorescence of *EcΔthiC\**-*EcΔthiE* co-cultures. **(C)** OD<sub>600</sub> and **(D)** fluorescence of *EcΔthiC*-

423 *EcΔthiE*\* co-cultures. (E) Percentage of *EcΔthiC* cells in the *EcΔthiC*\*-*EcΔthiE* co-cultures and the  
424 *EcΔthiC*-*EcΔthiE*\* co-cultures. Average values from two independent experiments are plotted.

425 Our experiments and subsequent calculations showed that the quantities of the  
426 strains in the co-cultures change over a period of 24 h when no thiamin is exogenously  
427 provided (Figure 6 and Figure S9). The OD<sub>600</sub> of the *Ec-C*\**E* co-culture increases over  
428 time as expected (Figure 6A). The fluorescence of the co-culture also increased,  
429 indicating that the quantity of the GFP-marked *EcΔthiC*\* strain increased over time (Figure  
430 6B). Next, we observed that for the *Ec-CE*\* co-culture in the absence of thiamin, the  
431 fluorescence did not increase even though the OD<sub>600</sub> value increased over time,  
432 reiterating that the *EcΔthiC* strain increased in numbers in the co-culture (Figures 6C and  
433 6D).

434 Interestingly, in the presence of thiamin, even though the OD<sub>600</sub> of the *Ec-C*\**E* co-  
435 culture increased over time, and the fluorescence increase in the *EcΔthiC*\* single culture  
436 cells was proportional to its growth as expected, the fluorescence of the *Ec-C*\**E* co-culture  
437 stayed constant over time (Figures 6A, B). This indicates that the ratio of the individual  
438 strains remains constant over time with respect to the starting ratio. Also, both the OD<sub>600</sub>  
439 and the fluorescence of the *Ec-CE*\* co-culture and the *EcΔthiE*\* single culture increased  
440 over time, confirming that the numbers the two participating strains do not deviate in the  
441 co-culture in the presence of thiamin (Figures 6C, D).

442 Upon quantifying the *Ec-C*\**E* and *Ec-CE*\* co-culture results, we found that in the  
443 absence of thiamin, the percentage of the *EcΔthiC* cells in the co-cultures increased over  
444 time, to attain an average ratio of ~8:2 of *EcΔthiC*: *EcΔthiE* cells at 24 h (Figure 6E). Also,  
445 the presence of GFP does not alter the final ratios of the strains in the co-cultures as

446 illustrated by both the *Ec-C\*E* and *Ec-CE\** co-cultures showing similar ratios. Comparable  
447 ratios were obtained when the *Ec-C\*G* co-cultures were similarly analyzed (Figure S9B).  
448 When the co-cultures were further transferred at the end of 24 h of growth to a fresh  
449 thiamin-deficient M9 medium in passage P3, the new ratios held constant over a period  
450 of 24 h (Figure S9A, C). Additionally, even after the continued growth of the P2 co-cultures  
451 for another ~24 h, the ratios attained stayed constant (Figure 6E, S9B). We hypothesize  
452 that this change in the ratio of the two strains results from the exchange of HMP and  
453 thiamin which equilibrates after ~24 h and subsequently stabilizes. However, in the  
454 presence of exogenously added thiamin, the exchange is no longer necessary and hence  
455 the ratios of the two strains remain mostly unaltered.

456

## 457 **Discussion**

458 Thiamin, an essential nutrient for living organisms, assists enzymes in executing  
459 key decarboxylation reactions in primary metabolism. Several studies based on  
460 metagenomic analyses predict that thiamin and its building blocks HMP and THZ can be  
461 salvaged by both thiamin auxotrophs and prototrophs (16, 17, 41). In this study, we  
462 investigate the mechanism of thiamin synthesis and exchange within a microbial  
463 community through a molecular lens.

464 It has been reported that secondary transporters of thiamin such as PnuT which  
465 facilitate bidirectional transport of the vitamin are found more often in prototrophs,  
466 whereas the ABC family primary transporters such as ThiT which promote the uptake of  
467 thiamin are found more often in auxotrophs (16, 17). It has also been observed for both  
468 marine and gut microbial communities that some organisms in the community might be



469 auxotrophic for the biosynthesis of both THZ and HMP, whereas certain others in the  
470 same community can produce both these intermediates, but lack the ability to combine  
471 them to form thiamin (16, 17). These observations reiterate that thiamin sharing is  
472 common among microorganisms.  
473

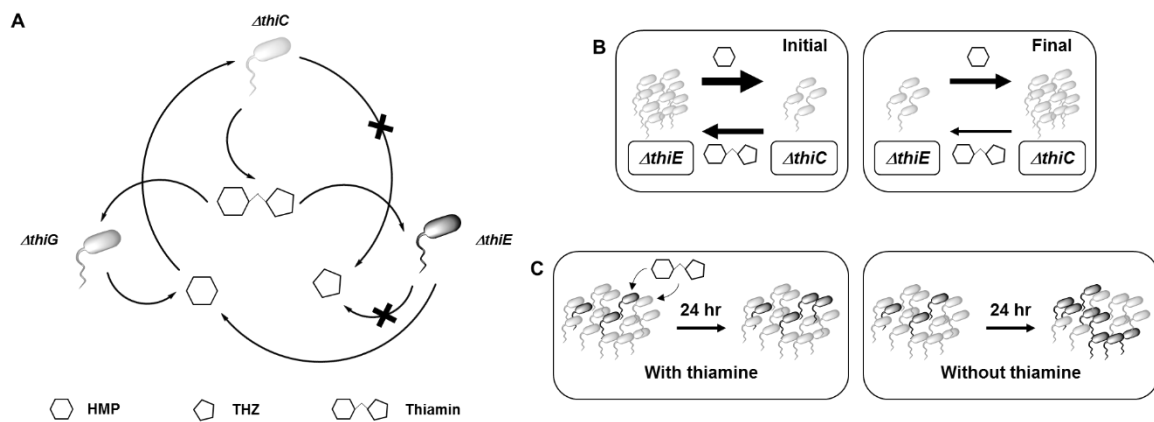

474  
475 **Figure 7. Proposed model for the exchange of thiamin biosynthesis intermediates in the**  
476 **co-cultures and effects of the exchange on the co-culture dynamics. (A)** Probable molecular  
477 exchanges among the thiamin mutants. **(B)** Probable exchanges in the co-culture of the *ΔthiC*-  
478 *ΔthiE* strains without thiamin at the initial and the final stages (after 24 h) of the co-culture.  
479 Thickness of the arrows is proportional to the amounts of the respective nutrients being released.  
480 **(C)** Ratios of the two strains in the co-culture differ based on the presence or absence thiamin,  
481 black cells = *ΔthiC* strain, grey cells = *ΔthiE* or *ΔthiG* strain. Hexagon = HMP, pentagon = THZ,  
482 linked hexagon and pentagon = thiamin.

483 To better understand the specifics of the exchange of thiamin and its intermediates  
484 in a community, we created synthetic co-cultures with bacterial strains with defined  
485 thiamin auxotrophy patterns. Our results from the *E. coli* and *V. anguillarum* co-cultures  
486 as well as mixed co-cultures of these two organisms show that thiamin and one of its  
487 biosynthesis intermediates HMP are commonly exchanged among microorganisms,  
488 whereas the exchange of the other intermediate THZ may occur less frequently and under  
489 specific conditions (Figure 7A). Our results show that the *Ec-EG* and *Va-EG* co-cultures  
490 do not grow, and we attribute this to the inability of THZ to be shared (illustrated in the  
491 schematic shown in Figure 7A and 1D). However, the mixed co-cultures i.e. in the *VaE-*  
492 *EcG* and the *VaC-EcG* co-cultures both show growth which indicates that there may be  
493 an exchange of THZ between these organisms (Figures 5A, B and 1D, E). Of these, the  
494 growth of the *VaE-EcG* co-culture was surprising and unexpected based on our previous  
495 results, and we reason out that there is only one possibility for how these two thiamin  
496 auxotroph strains may support one another's growth – *V. anguillarum*  $\Delta$ *thiE* supplies THZ  
497 to *E.coli*  $\Delta$ *thiG*, which produces thiamin and in turn returns it to *V. anguillarum*  $\Delta$ *thiE*,  
498 enabling it to grow and the co-culture to be sustained over 12 days (~300 hrs) (Figure  
499 5B). In the *VaC-EcG* co-culture, there are three possibilities as illustrated in schematic  
500 Figure 1E, briefly, (i) *Va* $\Delta$ *thiC*  $\rightarrow$  THZ  $\rightarrow$  *Ec* $\Delta$ *thiG*, *Ec* $\Delta$ *thiG*  $\rightarrow$  thiamin  $\rightarrow$  *Va* $\Delta$ *thiC* (ii)  
501 *Va* $\Delta$ *thiC*  $\rightarrow$  THZ  $\rightarrow$  *Ec* $\Delta$ *thiG*, *Ec* $\Delta$ *thiG*  $\rightarrow$  HMP  $\rightarrow$  *Va* $\Delta$ *thiC*, or (iii) *Ec* $\Delta$ *thiG*  $\rightarrow$  HMP  $\rightarrow$   
502 *Va* $\Delta$ *thiC*, *Va* $\Delta$ *thiC*  $\rightarrow$  thiamin  $\rightarrow$  *Ec* $\Delta$ *thiG*. Based on the observation that the *VaE-EcG* is  
503 able to grow, it opens up the possibility for any of these to occur. However, as the OD<sub>600</sub>  
504 of the *VaC-EcG* co-culture is significantly higher than the *VaE-EcG* co-culture, it is likely  
505 that the two co-cultures do not rely on the exchange of the same molecules (Figure 5A,

506 B). Based on this observation, we hypothesize that the *VaC-EcG* co-culture may follow  
507 possibilities (ii) and (iii), and this needs to be investigated further.

508 The unexpected growth of the *VaE-EcG* mixed co-culture in thiamin deficient  
509 media might be explained based on some of the characteristics of the co-culture  
510 inhabitants. The first possibility is that the cells of *Va $\Delta$ thiE* lyse owing to the longer  
511 incubation time of ~300 h as opposed to *Ec $\Delta$ thiE* cells in the *EcE-EcG* co-cultures which  
512 are grown for only 24 h. This results in the release of THZ in the medium, sufficient  
513 amount of which then accumulates and is salvaged by the *Ec $\Delta$ thiG* cells, and thus the  
514 *VaE-EcG* co-culture survives. But had this been the case, the *Va-EG* co-culture which  
515 showed no growth for ~300 h should have also survived (Figure 4C). We hypothesize that  
516 this inability to grow is because unlike *E. coli* which harbors ThiM, *V. anguillarum* lacks  
517 this enzyme that is essential for the conversion of THZ to THZ-P which is then routed into  
518 thiamin biosynthesis. Thus in respective co-cultures, adequate quantity of THZ is derived  
519 from *Va $\Delta$ thiE* cells either through lysis or release. But as the *Va $\Delta$ thiG* cells lack ThiM and  
520 thus cannot make THZ-P and subsequently thiamin, the *Va-EG* co-culture does not  
521 survive. On the other hand, as the *Ec $\Delta$ thiG* cells convert THZ to THZ-P and synthesize  
522 thiamin and provide it back to the *Va $\Delta$ thiE* cells, the *VaE-EcG* co-culture survives in the  
523 absence of any exogenous thiamin.

524 When calculating the ratios of the two strains in the co-culture, we noted that the  
525 *Ec $\Delta$ thiC* strain increases in the co-culture over time and the ratios of *Ec $\Delta$ thiC*: *Ec $\Delta$ thiG*  
526 and *Ec $\Delta$ thiC*: *Ec $\Delta$ thiE* finally stabilize at ~8:2. The role of the *Ec $\Delta$ thiG* or *Ec $\Delta$ thiE* strains  
527 in both co-cultures is to provide HMP, whereas that of *Ec $\Delta$ thiC* is to produce thiamin. Let  
528 us take the instance of the *Ec-CE* co-culture. The *Ec $\Delta$ thiE* strain (present in a higher

529 amount at the start) produces HMP and supplies it to the *EcΔthiC* strain. The *EcΔthiC*  
530 strain produces thiamin, and is now self-sufficient. However, as it grows and replicates, it  
531 will require more thiamin and hence, it needs a small but continuous supply of HMP, and  
532 hence, it provides the *EcΔthiE* strain with just enough thiamin such that some *EcΔthiE*  
533 cells continue to survive in the co-culture (Figure 7B). Thus, we can conclude that the  
534 strain that produces thiamin, which both strains need, plays a more significant role in the  
535 co-culture.

536 We also observed that when thiamin is supplemented to the co-cultures of the *E.*  
537 *coli thi-* mutants, the ratios of the two strains in the co-cultures do not deviate much from  
538 the starting ratios (Figure 7C). This suggests that when a nutrient is available in plenty in  
539 a community of auxotrophs, they may not interact with each other. But when the nutrient  
540 is unavailable or scarce, a crosstalk that allows for the microorganisms to collectively  
541 build and share the nutrient may evolve, which will result in subsequently shaping the  
542 composition of and relative abundance of members of the community. Indeed, it has been  
543 shown that the seasonal blooms of marine microorganisms which either produce or utilize  
544 thiamin alter concentrations of thiamin biosynthesis intermediates in seawater and when  
545 the microbial numbers are low, the overall concentrations of the intermediates remain at  
546 an equilibrium (32). Such changes in the community composition have also been reported  
547 earlier for synthetic co-cultures based on their differential ability of nutrient exchange or  
548 uptake (4, 5, 39).

549 Finally, we hypothesize that the reason for HMP being exchanged more readily as  
550 compared to THZ among auxotrophs is that the biosynthesis of THZ is more intricate as  
551 compared to the biosynthesis of HMP. THZ is assembled by *thiG* (or *thi4* in eukaryotes)

552 using three distinct intermediates from different pathways, one of which includes a series  
553 of intricate sulfur-transfer reactions, whereas HMP biosynthesis by *thiC* is a  
554 rearrangement of a single intermediate. Thus, the biosynthesis of HMP may have a lower  
555 metabolic expense as compared to THZ, making it easier for organisms to share HMP  
556 rather than THZ. Interestingly, one study reports that the ratio of the *thiC:thiG+thi4* genes  
557 in marine microbes is in the 0.06-0.28 range, always less than one (41). Congruently,  
558 another study reported higher concentrations of HMP than thiamin in surface waters of  
559 the Sargasso Sea, and that the abundance of *thiC* genes was lesser than the *thiG* genes  
560 at depths of 0, 40 and 80 m (23). Even beyond marine ecosystems, there is a propensity  
561 for HMP exchange within the human gut microbiome (HGM) as well, wherein out of the  
562 2,228 reference genomes studied, 199 were HMP auxotrophs, whereas only 114 were  
563 THZ auxotrophs (17). These studies, taken together with our observations, point to HMP  
564 and possibly other pyrimidine intermediates that can yield HMP via salvage as key  
565 nutrients in determining the dynamics of nutrient exchange and subsequently microbial  
566 abundance (22, 31, 32).

567

## 568 **Conclusion**

569 In this study, we have designed a unique co-culture system based on the exchange  
570 of intermediates derived from the same metabolic pathway, in this case vitamin B<sub>1</sub>  
571 biosynthesis. We conclude that the sharing of vitamin B<sub>1</sub> and its intermediates is  
572 modulated by the availability of as well as the presence of biosynthesis and transporter  
573 proteins in cells. Exchange forms the basis of building an interacting community of  
574 microbes, but may also be a feasible mechanism to halt interactions or limit the success

575 of portions of a community, e.g. provision of thiamin rather than HMP to prevent  
576 dominance of pyrimidine auxotrophs. Finally, our investigations at the molecular level  
577 underscore the specific role of metabolite exchange in determining, stabilizing and  
578 sustaining the collective metabolism and composition of our microbial co-cultures, making  
579 it possible to create defined communities for synthetic biology and biotechnological  
580 applications in the future.

581

## 582 **Materials and methods**

583 **Chemicals and reagents:** All the chemicals used were obtained either from TCI, HiMedia  
584 or Sigma unless otherwise specified. The enzymes used were obtained from TaKaRa.

585 **Strains and plasmids:** The *E. coli* K-12 MG1655 strain containing pKD46 and the  
586 plasmids pKD3 and pProEX-Hta were a gift from Dr. Nishad Matange at IISER Pune. The  
587 plasmids pCA24N-*EcthiC*, pCA24N-*EcthiG*, and pCA24N-*EccobT* were obtained from the  
588 ASKA collection hosted at IISER, Pune. The *E. coli* KL-16 strain harboring the *GFPmut2-*  
589 *kan<sup>R</sup>* cassette was a gift from Dr. Deepa Agashe at NCBS, Bangalore.

590 **Generating single gene knockouts in *E. coli*:** All the single knockout mutants of *E. coli*  
591 K-12 MG1655 used in the study were generated using recombination by  $\lambda$  Red  
592 Recombineering system (36, 43). The primers sequences used for generating the gene  
593 knockouts and for their verification are listed in the supplementary table 1. For generating  
594 the strains marked with GFP, we flipped out the *kan<sup>R</sup>* cassette from the *thi* mutants of *E.*  
595 *coli* K-12 MG1655. We then cloned and inserted the *GFPmut2::kan<sup>R</sup>* cassette from the *E.*  
596 *coli* KL-16 strain into the *thi* mutants, after *aidB* gene, in the reverse orientation with  
597 respect to the *aidB* gene. This gave us the following *E. coli* mutants – *thiC*

598 *aidB1633::GFPmut2-kan<sup>R</sup>* (*EcΔthiC\**), *thiE aidB1633::GFPmut2-kan<sup>R</sup>* (*EcΔthiE\**) and *thiG*  
599 *aidB1633::GFPmut2-kan<sup>R</sup>* (*EcΔthiG\**). The *GFPmut2-kan<sup>R</sup>* insertions were carried out  
600 using the same  $\lambda$  Red Recombineering system mentioned above.

601 ***Cloning of EcthiE, and transformations of the pCA24N plasmids:*** The *thiE* gene from  
602 *E. coli* K-12 MG1655 was cloned in pProEx-Hta vector using restriction-free cloning  
603 method as previously described (44). The empty pProEx-Hta vector and the pProEx-Hta-  
604 *EcthiE* vector were then chemically transformed into the *E. coli* K-12 MG1655  $\Delta$ *thiE::kan<sup>R</sup>*  
605 strain for complementation analysis. The pCA24N-*EccobT* was chemically transformed  
606 into *E. coli* K-12 MG1655  $\Delta$ *thiC::kan<sup>R</sup>*,  $\Delta$ *thiE::kan<sup>R</sup>*, and  $\Delta$ *thiG::kan<sup>R</sup>* strains for  
607 complementation analysis. The pCA24N-*EcthiC* and the pCA24N-*EcthiG* plasmids were  
608 chemically transformed into the *E. coli* K-12 MG1655  $\Delta$ *thiC::kan<sup>R</sup>* and  $\Delta$ *thiG::kan<sup>R</sup>* strains  
609 respectively.

610 ***Growth conditions and media:*** *E. coli* K-12 MG1655 cells were grown either in Luria-  
611 Bertani Miller (LB) or in M9 salts minimal medium at 37°C, 180 rpm (45). Whenever  
612 necessary, the medium was supplemented with various components in small defined  
613 amounts as mentioned.

614 ***Primary culture set-up (LB and P1 cultures) for E. coli:*** *E. coli* K-12 MG1655 WT,  
615  $\Delta$ *thiC*,  $\Delta$ *thiE*, and  $\Delta$ *thiG* mutants were grown in LB aerobically at 37°C, 180 rpm, for 6-8  
616 hours. The cultures were centrifuged at 6500 rpm for 1 minute and the pellets were  
617 washed thrice with 1X M9 salts by re-suspending them using a vortex for each wash. This  
618 step was used to make sure that the cells do not carry-over any residual nutrients from  
619 LB. These cells were used to start P1 cultures (first subcultures in minimal medium) in  
620 [M9 + NH<sub>4</sub>Cl + Glucose + Inosine (50  $\mu$ M)] medium, in 4 mL medium in 25 mL test-tubes,

621 at a starting OD<sub>600</sub> of 0.05, and were incubated aerobically at 37°C, 180 rpm, for 16-18  
622 hours. Cells grown in P1 were centrifuged at 6500 rpm for 1 minute and the pellets were  
623 washed thrice with 1X M9 salts.

624 For the *thi* mutant rescue experiments, the mutants with or without pProEx-Hta or  
625 pCA24N plasmids harboring the genes mentioned were grown similarly in P1,  
626 supplemented with or without thiamin (20 µM).

627 ***Pairwise co-culture set-up of E. coli mutants in P2:*** *E. coli* cells washed after P1 were  
628 used to start their co-cultures in P2 (second subcultures in minimal salts medium –  
629 composition described above) at a starting OD<sub>600</sub> of 0.1, in a 96-well plate with lid, with  
630 200 µL medium in each well, and were incubated aerobically at 37°C, ~240 rpm orbital  
631 shaking, for 24-96 hours, with OD<sub>600</sub> reading and fluorescence reading at excitation/  
632 emission values of 485/ 535 after every shaking cycle of ~300 sec, with upper lid at a  
633 temperature 2°C higher than 37°C (in EnSight) to avoid condensation, inside a plate  
634 reader – either Tecan or EnSight respectively. Alternately, the cells were grown in 25 mL  
635 test tubes with 4 mL medium each at 37°C, 180 rpm, in a shaker incubator. The media  
636 used were supplemented with various nutrients as and when required in the  
637 concentrations mentioned, for both the thiamin requirement and the HMP and THZ  
638 feeding studies. The two different mutants used for co-cultures were inoculated either  
639 singly as a control or in their co-culture at the ratios of 1:9 or 1:1 or 9:1. Both the single  
640 cultures as well as the co-cultures were inoculated at a starting OD<sub>600</sub> of 0.1, that is, say,  
641 for the co-cultures with the 1:9 ratio, the two mutants were mixed at a starting OD<sub>600</sub> of  
642 0.01 and 0.09 of the individual mutants, respectively. When using the alternate carbon  
643 sources, glucose (final concentration in the medium - 22.2 mM) was replaced with 33.3



644 mM Na-succinate or 44.4 mM Na-pyruvate, to keep the amount of carbon fed the same  
645 for all media.

646 **Re-inoculation experiments in P3:** For the re-inoculation experiments, the cells from  
647 the single cultures or the co-cultures were harvested at the end of 24 h, washed thrice  
648 with 1X M9 salts, re-inoculated in the fresh M9 minimal medium devoid of thiamin, at a  
649 starting O.D.<sub>600</sub> of 0.1, and incubated further at 37°C, 180 rpm, in 25 mL test tubes with 4  
650 mL medium each.

651 **OD<sub>600</sub> and fluorescence correlation:** For the OD<sub>600</sub> and fluorescence correlation, the  
652 cells were grown in all four possible pairwise combinations of the *EcΔthiC::kan<sup>R</sup>* strain or  
653 the *EcΔthiC\** strain with the *EcΔthiE::kan<sup>R</sup>* strain or the *EcΔthiE\** strain. The values of the  
654 total fluorescence of the co-cultures carrying a single fluorescent strain were then  
655 normalized using the co-culture of the *EcΔthiC::kan<sup>R</sup>* strain with the *EcΔthiE::kan<sup>R</sup>* strain  
656 as a control, and the OD<sub>600</sub> value of that fluorescent strain was calculated using the  
657 fluorescence v/s OD<sub>600</sub> correlation of that strain. From this exercise, we obtained the  
658 ratios of the strains in the co-cultures of the *EcΔthiC::kan<sup>R</sup>* strain with the *EcΔthiE::kan<sup>R</sup>*  
659 strain and those of the *EcΔthiC::kan<sup>R</sup>* strain with the *EcΔthiG::kan<sup>R</sup>* strain at different time  
660 points.

661 **Thiochrome assay to detect the presence of thiamin from lysates:** 2 mL cells each  
662 from the single cultures and co-cultures were harvested at different time points and lysed  
663 in 125 μL of 1X PBS. The lysates were centrifuged at 14000 rpm, 4°C, and 100 μL each  
664 of the clarified lysate or spent medium were used to detect the presence of thiamin, TMP  
665 and TDP using HPLC-FLD and LC-MS/MS. The thiochrome assay was carried out as per  
666 a protocol previously described (42). Thiochrome formed was detected using HPLC-FLD

667 (Agilent) on a C-18 reverse phase column (Phenomenex – Gemini), at 25°C. The solvents  
668 used were MilliQ in line A, methanol in line B, and 10 mM CH<sub>3</sub>COONa, pH 6.6 in line C.  
669 100 µL of the standards or the samples were injected in HPLC for analysis. A standard  
670 curve on HPLC was generated using various concentrations of thiamin.HCl, TMP and  
671 TDP standards. The flow rate was maintained at 0.5 mL/ min. The HPLC and LC-MS/MS  
672 method used was 0 min: 100% A; 4 min: 90% A, 10% B; 20 min: 15% A, 25% B, 60% C;  
673 24 min: 15% A, 25% B, 60% C; 30 min: 100% A; 44 min: 100% A. All samples were ran  
674 in positive ion mode with ESI method of ionization on SciEX-X500LR system for LC-  
675 MS/MS analysis.

676

677 **V. anguillarum cultures and experiments:** *Vibrio anguillarum* PF430-3 (46, 47) wild-  
678 type and mutants  $\Delta thiC$ ,  $\Delta thiE$ , and  $\Delta thiG$  (41) were used in experiments. All were re-  
679 isolated from cryopreserved stock using marine broth agar plates and liquid medium (48)  
680 with estuarine surface water from MODMON Neuse River Estuary monitoring station 180  
681 (49) as the base medium. Cells from liquid ZoBell cultures in late exponential or early  
682 stationary phase were washed and centrifuged (9,000 g, 3 min) thrice with 1X M9 medium  
683 without thiamin and then resuspended in M9 medium without thiamin. Absorbance at 600  
684 nm (optical density, OD) was measured using a spectrophotometer (GENESYS 30,  
685 Thermo). Based the OD of resuspended cell cultures, 0.001 OD of washed cells was  
686 added (final density) at the start of each experiment.

687 Co-cultures of PF430-4 strains were started by adding 0.001 OD (final conc.) of  
688 each strain to M9 medium. Cultures were grown in clear sterile polystyrene tubes, and  
689 incubated in the dark at 20°C with daily homogenization by repetitive inversion. Thiamin

690 hydrochloride, HMP, THZ used in experiments were purchased from TCI, Alfa Aesar,  
691 Fisher Scientific at  $\geq 98\%$  HPLC purity. Fresh solutions of vitamins were prepared under  
692 reduced light in a laminar flow hood autoclaved MilliQ water as the dilutant. Solutions  
693 were kept on ice while setting up experiments.

694 *E. coli JW5549  $\Delta thiG761::kan$*  (Keio Collection) was re-isolated as for PF430-4 but  
695 using M9 as the base for ZoBell solid and liquid media. Cells were washed and  
696 resuspended in M9 medium without B1 as for PF430-4. Co-cultures of PF430-4  *$\Delta thiC$*  or  
697  *$\Delta thiE$*  and *E. coli JW5549  $\Delta thiG761::kan$*  were initiated by adding 0.001 OD of each cell  
698 type to M9 medium without amended B1. Growth conditions were the same as for PF430-  
699 4.

700

## 701 **Acknowledgements**

702 We acknowledge Deepa Agashe and Nishad Matange for providing specific *E. coli* strains  
703 and plasmids. We thank Gayathri Pananghat, Manjula Reddy, and Nishad Matange for  
704 insightful discussions. We thank PerkinElmer-IISER Pune Centre of Excellence, IISER  
705 Biology LC-MS facility, and Sandanaraj Britto and Thomas Pucadyil labs for  
706 instrumentation. We also thank Yamini Mathur, Yashwant Kumar, and Ateek Shah for  
707 their critical inputs. We acknowledge Saswata Nayak, Rituparna Ghosh, Mir Nasir  
708 Ahmed, and Gina Welsing for their contribution.

709

## 710 **Funding**

711 R.R.M.S. is supported by fellowships from IISER Pune and Council for Scientific and  
712 Industrial Research (CSIR), India – NET. The research is supported by funds provided by

713 the Ministry of Science and Technology, Government of India Department of  
714 Biotechnology (DBT) – Ramalingaswami Re-entry fellowship BT/RLF/Re-entry/12/2014  
715 to A.B.H, and is in part based upon work supported by the US National Science  
716 Foundation under Grant No. OCE #2049388 to R.W.P.

717

## 718 **References**

- 719 1. Zengler K, Zaramela LS. 2018. The social network of microorganisms - How  
720 auxotrophies shape complex communities. *Nat Rev Microbiol* 16:383–390.
- 721 2. D'Souza G, Shitut S, Preussger D, Yousif G, Waschina S, Kost C. 2018. Ecology  
722 and evolution of metabolic cross-feeding interactions in bacteria. *Nat Prod Rep*  
723 35:455–488.
- 724 3. Douglas AE. 2020. The microbial exometabolome: ecological resource and  
725 architect of microbial communities. *Philosophical Trans R Soc B* 375:20190250 doi:  
726 10.1098/rstb.2019.0250.
- 727 4. Shou W, Ram S, Vilar JMG. 2007. Synthetic cooperation in engineered yeast  
728 populations. *Proc Natl Acad Sci U S A* 104:1877–1882.
- 729 5. Cooper MB, Kazamia E, Helliwell KE, Kudahl UJ, Sayer A, Wheeler GL, Smith  
730 AG. 2019. Cross-exchange of B-vitamins underpins a mutualistic interaction  
731 between *Ostreococcus tauri* and *Dinoroseobacter shibae*. *ISME J* 13:334–345.
- 732 6. Pande S, Shitut S, Freund L, Westermann M, Bertels F, Colesie C, Bischofs IB,  
733 Kost C. 2015. Metabolic cross-feeding via intercellular nanotubes among bacteria.  
734 *Nat Commun* 6:6238 doi: 10.1038/ncomms7238.
- 735 7. Wang P-H, Correia K, Ho H, Venayak N, Nembr K, Flick R, Mahadevan R,

- 736 Edwards EA. 2019. An interspecies malate – pyruvate shuttle reconciles redox  
737 imbalance in an anaerobic microbial community. *ISME J* 13:1042–1055.
- 738 8. Kazamia E, Helliwell KE, Purton S, Smith AG. 2016. How mutualisms arise in  
739 phytoplankton communities: building eco- evolutionary principles for aquatic  
740 microbes. *Ecol Lett* 19:810–822.
- 741 9. Helliwell KE, Wheeler GL, Leptos KC, Goldstein RE, Smith AG. 2011. Insights  
742 into the evolution of vitamin B 12 auxotrophy from sequenced algal genomes. *Mol*  
743 *Biol Evol* 28:2921–2933.
- 744 10. Giovannoni SJ, Tripp HJ, Givan S, Podar M, Vergin KL, Baptista D, Bibbs L, Eads  
745 J, Richardson TH, Noordewier M, Rappe MS, Short JM, Carrington JC, Mathur  
746 EJ. 2005. Genome Streamlining in a Cosmopolitan Oceanic Bacterium. *Science*  
747 309:1242–1245.
- 748 11. Helliwell KE, Wheeler GL, Smith AG. 2013. Widespread decay of vitamin-related  
749 pathways: coincidence or consequence? *Trends Genet* 29:469–478.
- 750 12. D’Souza G, Waschina S, Pande S, Bohl K, Kaleta C, Kost C. 2014. Less is more:  
751 selective advantages can explain the prevalent loss of biosynthetic genes in  
752 bacteria. *Evolution* 68:2559–2570.
- 753 13. Hillesland KL, Lim S, Flowers JJ, Turkarslan S, Pinel N, Zane GM, Elliott N, Qin  
754 Y, Wu L, Baliga NS, Zhou J, Wall JD, Stahl DA. 2014. Erosion of functional  
755 independence early in the evolution of a microbial mutualism. *Proc Natl Acad Sci*  
756 *U S A* 111:14822–14827.
- 757 14. Banerjee S, Schlaeppli K, van der Heijden MGA. 2018. Keystone taxa as drivers  
758 of microbiome structure and functioning. *Nat Rev Microbiol* 16:567–576.

- 759 15. Ze X, Duncan SH, Louis P, Flint HJ. 2012. *Ruminococcus bromii* is a keystone  
760 species for the degradation of resistant starch in the human colon. *ISME J*  
761 6:1535–1543.
- 762 16. Romine MF, Rodionov DA, Maezato Y, Osterman AL, Nelson WC. 2017.  
763 Underlying mechanisms for syntrophic metabolism of essential enzyme cofactors  
764 in microbial communities. *ISME J* 11:1434–1446.
- 765 17. Rodionov DA, Arzamasov AA, Khoroshkin MS, Iablokov SN, Leyn SA, Peterson  
766 SN, Novichkov PS, Osterman AL. 2019. Micronutrient requirements and sharing  
767 capabilities of the human gut microbiome. *Front Microbiol* 10:1316 doi:  
768 10.3389/fmicb.2019.01316.
- 769 18. Sañudo-Wilhelmy SA, Gómez-Consarnau L, Suffridge C, Webb EA. 2014. The  
770 Role of B Vitamins in Marine Biogeochemistry. *Ann Rev Mar Sci* 6:339–367.
- 771 19. Sharma V, Rodionov DA, Leyn SA, Tran D, Iablokov SN, Ding H, Peterson DA,  
772 Osterman AL. 2019. B-Vitamin Sharing Promotes Stability of Gut Microbial  
773 Communities. *Front Microbiol* 10:1485 doi: 10.3389/fmicb.2019.01485.
- 774 20. Rodionova IA, Li X, Plymale AE, Motamedchaboki K, Konopka AE, Romine MF,  
775 Fredrickson JK, Osterman AL, Rodionov DA. 2015. Genomic distribution of B-  
776 vitamin auxotrophy and uptake transporters in environmental bacteria from the  
777 *Chloroflexi* phylum. *Environ Microbiol Rep* 7:204–210.
- 778 21. Soderberg T. 2016. *Organic Chemistry with a Biological Emphasis Volume II*.  
779 Chemistry Publications. 2.
- 780 22. Gutowska MA, Shome B, Sudek S, Mcrose DL, Hamilton M, Giovannoni SJ,  
781 Begley TP, Worden AZ. 2017. Globally Important Haptophyte Algae Use

- 782 Exogenous Pyrimidine Compounds More Efficiently than Thiamin. *mBio*  
783 8:e01459-17 doi: 10.1128/mBio.01459-17.
- 784 23. Carini P, Campbell EO, Morr e J, Sa udo-Wilhelmy SA, Cameron Thrash J,  
785 Bennett SE, Temperton B, Begley T, Giovannoni SJ. 2014. Discovery of a SAR11  
786 growth requirement for thiamin’s pyrimidine precursor and its distribution in the  
787 Sargasso Sea. *ISME J* 8:1727–1738.
- 788 24. Paerl RW, Bouget FY, Lozano JC, Verg e V, Schatt P, Allen EE, Palenik B, Azam  
789 F. 2017. Use of plankton-derived vitamin B1 precursors, especially thiazole-  
790 related precursor, by key marine picoeukaryotic phytoplankton. *ISME J* 11:753–  
791 765.
- 792 25. Rodionov DA, Vitreschak AG, Mironov AA, Gelfand MS. 2002. Comparative  
793 genomics of thiamin biosynthesis in procaryotes. New genes and regulatory  
794 mechanisms. *J Biol Chem* 277:48949–48959.
- 795 26. Jaehme M, Slotboom DJ. 2015. Diversity of membrane transport proteins for  
796 vitamins in bacteria and archaea. *Biochim Biophys Acta - Gen Subj* 1850:565–  
797 576.
- 798 27. Romine MF, Rodionov DA, Maezato Y, Osterman AL, Nelson WC. 2017.  
799 Underlying mechanisms for syntrophic metabolism of essential enzyme cofactors  
800 in microbial communities. *ISME J* 11:1434–1446.
- 801 28. Belda E, Moya A, Bentley S, Silva FJ. 2010. Mobile genetic element proliferation  
802 and gene inactivation impact over the genome structure and metabolic  
803 capabilities of *Sodalis glossinidius*, the secondary endosymbiont of tsetse flies.  
804 *BMC Genomics* 11:449 doi: 10.1186/1471-2164-11-449.

- 805 29. Paerl RW, Bertrand EM, Rowland E, Schatt P, Mehiri M, Niehaus TD, Hanson  
806 AD, Riemann L, Bouget FY. 2018. Carboxythiazole is a key microbial nutrient  
807 currency and critical component of thiamin biosynthesis. *Sci Rep* 8:5940 doi:  
808 10.1038/s41598-018-24321-2.
- 809 30. Rodionov DA, Hebbeln P, Eudes A, Beek J, Rodionova IA, Erkens GB, Slotboom  
810 DJ, Gelfand MS, Osterman AL, Hanson AD, Eitinger T. 2009. A Novel Class of  
811 Modular Transporters for Vitamins in Prokaryotes 191:42–51.
- 812 31. Jenkins AH, Schyns G, Potot S, Sun G, Begley TP. 2007. A new thiamin salvage  
813 pathway. *Nat Chem Biol* 3:492–497.
- 814 32. Suffridge CP, Bolaños LM, Bergauer K, Worden AZ, Morré J, Behrenfeld MJ,  
815 Giovannoni SJ. 2020. Exploring Vitamin B1 Cycling and Its Connections to the  
816 Microbial Community in the North Atlantic Ocean. *Front Mar Sci* 7:606342 doi:  
817 10.3389/fmars.2020.606342.
- 818 33. Zengler K, Zaramela LS. 2018. The social network of microorganisms - How  
819 auxotrophies shape complex communities. *Nat Rev Microbiol* 16:383–390.
- 820 34. Begley TP, Downs DM, Ealick SE, McLafferty FW, Van Loon APGM, Taylor S,  
821 Campobasso N, Chiu H-J, Kinsland C, Reddick JJ, Xi J. 1999. Thiamin  
822 biosynthesis in prokaryotes. *Arch Microbiol* 171:293–300.
- 823 35. Miranda-Ríos J, Navarro M, Soberón M. 2001. A conserved RNA structure (*thi*  
824 *box*) is involved in regulation of thiamin biosynthetic gene expression in bacteria.  
825 *Proc Natl Acad Sci U S A* 98:9736–9741.
- 826 36. Baba T, Ara T, Hasegawa M, Takai Y, Okumura Y, Baba M, Datsenko KA, Tomita  
827 M, Wanner BL, Mori H. 2006. Construction of *Escherichia coli* K-12 in-frame,



- 828 single-gene knockout mutants: the Keio collection. *Mol Syst Biol* 2:2006.0008 doi:  
829 10.1038/msb4100050.
- 830 37. Kim J, Copley SD. 2007. Why Metabolic Enzymes Are Essential or Nonessential  
831 for Growth of *Escherichia coli* K12 on Glucose. *Biochemistry* 46:12501–12511.
- 832 38. Bazurto J V, Farley KR, Downs DM. 2016. An Unexpected Route to an Essential  
833 Cofactor : *Escherichia coli* Relies on Threonine for Thiamine Biosynthesis. *MBio*  
834 7:e01840-15 doi: 10.1128/mBio.01840-15.
- 835 39. Costliow ZA, Degnan PH. 2017. Thiamine Acquisition Strategies Impact  
836 Metabolism and Competition in the Gut Microbe *Bacteroides thetaiotaomicron*.  
837 *mSystems* 2:e00116-17 doi: 10.1128/mSystems.00116-17.
- 838 40. Horn PB Vander, Backstrom AD, Stewart V, Begley TP. 1993. Structural Genes  
839 for Thiamine Biosynthetic Enzymes (*thiCEFGH*) in *Escherichia coli* K-12 175:982–  
840 992.
- 841 41. Paerl RW, Sundh J, Tan D, Svenningsen SL, Hylander S, Pinhassi J, Andersson  
842 AF, Riemann L. 2018. Prevalent reliance of bacterioplankton on exogenous  
843 vitamin B1 and precursor availability. *Proc Natl Acad Sci* 115:E10447–E10456  
844 doi: 10.1073/pnas.1806425115.
- 845 42. Hazra AB, Han Y, Chatterjee A, Zhang Y, Lai R, Ealick SE, Begley TP. 2011. A  
846 Missing Enzyme in Thiamin Thiazole Biosynthesis : Identification of TenI as a  
847 Thiazole Tautomerase ‡. *J Am Chem Soc* 133:9311–9319.
- 848 43. Datsenko KA, Wanner BL. 2000. One-step inactivation of chromosomal genes in  
849 *Escherichia coli* K-12 using PCR products. *Proc Natl Acad Sci U S A* 97:6640–  
850 6645.

- 851 44. Ent F van den, Löwe J. 2006. RF cloning: A restriction-free method for inserting  
852 target genes into plasmids. *J Biochem Biophys Methods* 67:67–74.
- 853 45. Sambrook J, Russel DW. 2001. *Molecular cloning: a laboratory manual* Volume 3,  
854 3rd ed. Cold Spring Harbor Laboratory Press, Cold Spring Harbor, New York.
- 855 46. Tan D, Svenningsen S Lo, Middelboe M. 2015. Quorum Sensing Determines the  
856 Choice of Antiphage Defense Strategy in *Vibrio anguillarum*. *MBio* 6:e00627-15  
857 doi: 10.1128/mBio.00627-15.
- 858 47. Silva-Rubio A, Avendaño-Herrera R, Jaureguiberry B, Toranzo AE, Magariños B.  
859 2008. First description of serotype O3 in *Vibrio anguillarum* strains isolated from  
860 salmonids in Chile. *J Fish Dis* 31:235–239.
- 861 48. ZoBell CE. 1941. Studies on marine bacteria. I. The cultural requirements of  
862 heterotrophic aerobes. *J Mar Res* IV:42–75.
- 863 49. Paerl HW, Hall NS, Hounshell AG, Luettich Jr RA, Rossignol KL, Osburn CL,  
864 Bales J. 2019. Recent increase in catastrophic tropical cyclone flooding in coastal  
865 North Carolina , USA : Long-term observations suggest a regime shift. *Sci Rep*  
866 9:10620 doi: 10.1038/s41598-019-46928-9.
- 867
